# Supplementary material for: miRNA Signature of Mouse Helper T Cell Hyper-Proliferation
Source: PubMed Central journal article supplement (PMC3692518; doi:10.1371/journal.pone.0066709), 2013-06-25

Figure S2.

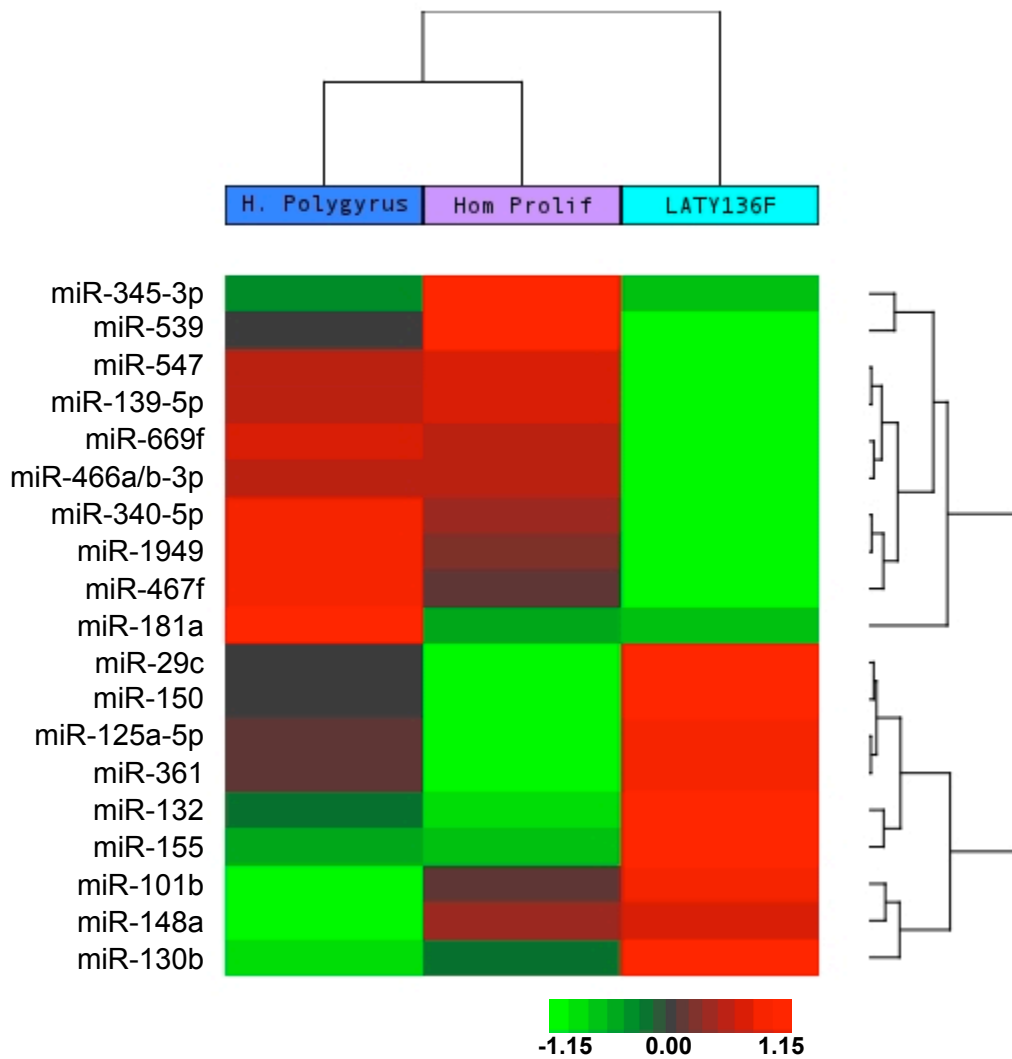

Supplement: pone.0066709.s002.pdf [file pone.0066709.s002.pdf]
