# Supplementary material for: miRNA Signature of Mouse Helper T Cell Hyper-Proliferation
Source: PubMed Central journal article supplement (PMC3692518; doi:10.1371/journal.pone.0066709), 2013-06-25
Supplement: pone.0066709.s006.pdf [file pone.0066709.s006.pdf]

Table S1. Fold changes of miRNAs relative to C57BL/6 naïve CD4<sup>+</sup> T cells\*

| miRNA             | LAT Y136F<br>vs B6 naïve | HP vs B6<br>naïve | H poly vs B6<br>naïve | B6 memory vs<br>B6 naïve |
|-------------------|--------------------------|-------------------|-----------------------|--------------------------|
| mmu-miR-150       | -1.35482                 | -2.77907          | -1.96482              | -2.97647                 |
| mmu-miR-142-3p    | -1.38521                 | -1.82792          | -1.23576              | -1.38992                 |
| mmu-miR-16        | -1.337                   | -1.29199          | -1.13179              | 1.25571                  |
| mmu-miR-15b       | -2.12532                 | -1.72511          | -1.31342              | 1.36424                  |
| mmu-let-7g        | -1.41584                 | -1.34702          | -1.03053              | 1.05342                  |
| mmu-miR-29b       | 1.50905                  | -1.11697          | 1.42198               | 1.43574                  |
| mmu-miR-29a       | -1.22558                 | -1.79196          | 1.01611               | -1.15102                 |
| mmu-let-7a        | 1.10082                  | -1.22721          | 1.15579               | 1.15309                  |
| mmu-miR-30b       | -1.31424                 | -2.46629          | -1.31385              | -1.42718                 |
| mmu-let-7f        | -1.19744                 | -2.07268          | -1.20189              | -1.24318                 |
| mmu-miR-21        | 23.1061                  | 19.2715           | 13.4264               | 15.2338                  |
| mmu-let-7c        | -2.10025                 | -4.16313          | -1.75139              | -1.55021                 |
| mmu-miR-181a      | -32.7758                 | -26.3909          | -1.91798              | -1.87395                 |
| mmu-miR-106+17    | 1.38487                  | 1.45381           | 1.1702                | 1.20891                  |
| mmu-miR-25        | 1.02886                  | 1.17207           | 1.06452               | -1.02498                 |
| mmu-miR-15a       | 2.42214                  | 2.78146           | 2.04402               | 1.86466                  |
| mmu-let-7d        | 1.11993                  | 1.26657           | 1.28413               | 1.2849                   |
| mmu-let-7b        | -2.24376                 | -2.69813          | -1.48967              | -2.5457                  |
| mmu-miR-342-3p    | -1.39412                 | -2.33432          | 1.26386               | -1.42557                 |
| mmu-miR-26b       | -1.73215                 | -2.61445          | -1.27622              | -1.19133                 |
| mmu-miR-106b      | 1.05965                  | 1.26879           | 1.00144               | 1.22214                  |
| mmu-miR-19a       | 1.08367                  | 1.11545           | -1.46489              | -1.20559                 |
| mmu-miR-669f      | -7.15291                 | -2.31585          | -2.09166              | -1.83523                 |
| mmu-miR-30d       | -1.28384                 | -1.29986          | -1.28178              | -1.10366                 |
| mmu-miR-20a/b     | 1.00278                  | -1.36273          | -1.16651              | -1.1749                  |
| mmu-miR-151-3p    | -1.61619                 | -2.38596          | -2.4954               | -3.49049                 |
| mmu-miR-297c      | -1.10733                 | 1.69984           | -1.18311              | -1.59819                 |
| mmu-miR-29c       | 2.57157                  | 1.22935           | 1.82221               | 1.55141                  |
| mmu-miR-30e       | -1.74793                 | -1.59263          | -1.36327              | -1.01568                 |
| mmu-miR-151-5p    | -1.26627                 | -2.12444          | -1.98393              | -2.69316                 |
| mmu-miR-19b       | 1.19224                  | 1.14125           | -1.20405              | -1.30645                 |
| mmu-miR-155       | 5.25492                  | 2.25172           | 2.45374               | 5.0861                   |
| mmu-miR-467f      | -4.79018                 | -2.80482          | -1.86695              | -1.98231                 |
| mmu-miR-378       | -2.33777                 | -2.66257          | -2.27912              | -1.45057                 |
| mmu-miR-466a/b-3p | -9.12889                 | -2.90585          | -2.84826              | -1.55391                 |
| mmu-miR-146a      | 24.2971                  | 25.6629           | 20.4781               | 23.4727                  |
| mmu-miR-145       | -1.62672                 | 1.01481           | -2.32609              | -1.32428                 |
| mmu-miR-10a       | -2.2669                  | -2.13941          | -2.26236              | -1.59851                 |
| mmu-miR-191       | 1.59708                  | 1.14734           | 1.37818               | 1.32273                  |
| mmu-miR-27a       | 3.16166                  | 2.77751           | 2.84212               | 2.56662                  |

|                        |          |          |          |          |
|------------------------|----------|----------|----------|----------|
| <b>mmu-miR-140</b>     | -1.24351 | -1.04574 | 1.05318  | 1.52832  |
| <b>mmu-miR-23b</b>     | 1.95055  | 1.00397  | 1.63841  | 1.2669   |
| <b>mmu-miR-361</b>     | 1.531    | -3.31282 | -1.24894 | -1.31239 |
| <b>mmu-miR-22</b>      | 2.84567  | 3.42193  | 3.2948   | 2.28617  |
| <b>mmu-miR-26a</b>     | -1.24725 | 1.09288  | 1.00312  | -1.06118 |
| <b>mmu-miR-2183</b>    | -1.41908 | 1.23743  | 1.03275  | -1.24318 |
| <b>mmu-miR-423-5p</b>  | -1.50528 | -2.53896 | -1.16207 | -1.05653 |
| <b>mmu-miR-30c</b>     | -1.55242 | -1.97574 | -1.61397 | -1.62547 |
| <b>mmu-miR-466g</b>    | -1.37759 | -1.15038 | -1.00728 | -1.07968 |
| <b>mmu-miR-547</b>     | -2.19141 | -1.01529 | -1.1281  | -1.46513 |
| <b>mmu-miR-338-5p</b>  | -1.09571 | -1.23283 | -2.01457 | -1.24344 |
| <b>mmu-let-7i</b>      | 2.38494  | 1.79639  | 1.48916  | 1.48675  |
| <b>mmu-miR-883b-3p</b> | -1.61774 | 1.23373  | -1.55872 | -2.56918 |
| <b>mmu-miR-103</b>     | 1.54537  | 1.23373  | 1.92498  | 1.32318  |
| <b>mmu-miR-374</b>     | 1.86459  | 1.58279  | 1.29139  | -1.33501 |
| <b>mmu-miR-30a</b>     | -1.77841 | -1.62739 | -1.4078  | -1.5137  |
| <b>mmu-miR-1949</b>    | -3.94195 | -2.01633 | -1.53794 | -1.01723 |
| <b>mmu-miR-345-3p</b>  | -1.30997 | 1.83868  | -1.1113  | -1.40569 |
| <b>mmu-miR-101b</b>    | 1.25924  | -1.08922 | -1.7799  | -1.63525 |
| <b>mmu-miR-340-5p</b>  | -2.50415 | -1.39457 | -1.13921 | -1.49196 |
| <b>mmu-miR-544</b>     | -1.3486  | 1.19553  | -2.05098 | -1.42084 |
| <b>mmu-miR-423-3p</b>  | -1.1312  | -1.04547 | -1.36693 | -1.65682 |
| <b>mmu-miR-200b</b>    | -1.16844 | 1.43455  | 1.3169   | -1.24305 |
| <b>mmu-miR-98</b>      | 1.02666  | 1.30411  | 1.17036  | 1.13376  |
| <b>mmu-miR-148b</b>    | -1.16909 | -1.49369 | -1.06794 | 1.04572  |
| <b>mmu-miR-669i</b>    | -1.39142 | -1.30735 | -1.31503 | -1.46221 |
| <b>mmu-miR-148a</b>    | 10.0523  | 7.75142  | 2.83359  | 2.79487  |
| <b>mmu-miR-484</b>     | 1.71067  | 1.48703  | 1.43015  | 1.3407   |
| <b>mmu-miR-139-5p</b>  | -3.75726 | 1.48703  | 1.23523  | 1.07234  |
| <b>mmu-miR-301a</b>    | 1.96707  | 1.79255  | 1.53541  | 1.25652  |
| <b>mmu-miR-135b</b>    | -1.46079 | -1.30763 | 1.01392  | 1.01922  |
| <b>mmu-miR-376a</b>    | 1.87078  | 1.78462  | 1.79457  | 1.23327  |
| <b>mmu-miR-489</b>     | 1.00398  | 1.65739  | -1.60191 | -1.33186 |
| <b>mmu-miR-876-3p</b>  | 1.00398  | 1.27502  | -1.83132 | -1.33186 |
| <b>mmu-miR-132</b>     | 2.5096   | -1.5686  | -1.06794 | 1.71637  |
| <b>mmu-miR-23a</b>     | 3.46787  | 3.95229  | 4.68059  | 3.75413  |
| <b>mmu-miR-539</b>     | 1.09542  | 2.2949   | 1.55997  | 1.23327  |
| <b>mmu-miR-93</b>      | 1.85795  | 3.00568  | 1.83948  | 1.14914  |
| <b>mmu-miR-125a-5p</b> | 5.9659   | 1.09304  | 2.92612  | 2.70099  |
| <b>mmu-miR-130b</b>    | 2.52676  | 1.47095  | 1.08028  | 1.36086  |
| <b>mmu-let-7e</b>      | 2.36851  | 1.32339  | 1.25994  | 1.54663  |
| <b>mmu-miR-350</b>     | 1.19802  | 1.27506  | 1.95029  | 2.01161  |
| <b>mmu-miR-24</b>      | 3.42255  | 2.55013  | 2.04806  | 2.41342  |

|                     |         |         |         |         |
|---------------------|---------|---------|---------|---------|
| <b>mmu-miR-107</b>  | 2.48074 | 2.86833 | 3.21739 | 2.61366 |
| <b>mmu-miR-1902</b> | 4.10795 | 2.73295 | 4.84941 | 2.0696  |
| <b>mmu-miR-96</b>   | 5.67327 | 7.92467 | 3.00993 | 1.83948 |

\*Fold changes for miRNAs with Nanostring counts that passed the minimum intensity filter. miRNAs are ordered by rows according to expression in C57BL/6 naïve CD4<sup>+</sup> T cells beginning with highest expression on the top. LAT Y136F indicates LAT Y136F CD4<sup>+</sup> T cells, B6 HP indicates C57BL/6 CD4<sup>+</sup> T cells undergoing homeostatic proliferation, B6 H poly indicates C57BL/6 CD4<sup>+</sup> T cells from *H. polygyrus*-infected mice and B6 memory indicates C57BL/6 CD4<sup>+</sup> T cells that are also CD44<sup>hi</sup>CD62L<sup>lo</sup>. B6 naïve CD4<sup>+</sup> T cells are C57BL/6 CD4<sup>+</sup> T cells that are also CD44<sup>lo</sup>CD62L<sup>hi</sup>.
