# Supplementary material for: miRNA Signature of Mouse Helper T Cell Hyper-Proliferation
Source: PubMed Central journal article supplement (PMC3692518; doi:10.1371/journal.pone.0066709), 2013-06-25
Supplement: pone.0066709.s007.pdf [file pone.0066709.s007.pdf]

Table S2. Fold changes of miRNAs relative to C57BL/6 memory CD4<sup>+</sup> T cells\*

| miRNA             | LATY136F<br>vs B6<br>memory | HP vs B6<br>memory | H poly vs<br>B6<br>memory |
|-------------------|-----------------------------|--------------------|---------------------------|
| mmu-miR-150       | 2.19695                     | 1.07103            | 1.51488                   |
| mmu-miR-142-3p    | 1.0034                      | -1.31513           | 1.12475                   |
| mmu-miR-16        | -1.67888                    | -1.62237           | -1.42119                  |
| mmu-miR-15b       | -2.89945                    | -2.35347           | -1.79183                  |
| mmu-let-7g        | -1.49148                    | -1.41898           | -1.08558                  |
| mmu-miR-29b       | 1.05106                     | -1.60367           | -1.00967                  |
| mmu-miR-29a       | -1.06478                    | -1.55685           | 1.16956                   |
| mmu-let-7a        | -1.04749                    | -1.41509           | 1.00234                   |
| mmu-miR-30b       | 1.08594                     | -1.72808           | 1.08626                   |
| mmu-let-7f        | 1.0382                      | -1.66724           | 1.03435                   |
| mmu-miR-21        | 1.51677                     | 1.26505            | -1.13461                  |
| mmu-let-7c        | -1.35482                    | -2.68554           | -1.12978                  |
| mmu-miR-181a      | -17.4903                    | -14.0831           | -1.0235                   |
| mmu-miR-106a+17   | 1.14555                     | 1.20258            | -1.03308                  |
| mmu-miR-25        | 1.05456                     | 1.20134            | 1.0911                    |
| mmu-miR-15a       | 1.29897                     | 1.49167            | 1.09619                   |
| mmu-let-7d        | -1.14731                    | -1.01447           | -1.0006                   |
| mmu-let-7b        | 1.13457                     | -1.05988           | 1.7089                    |
| mmu-miR-342-3p    | 1.02256                     | -1.63746           | 1.80173                   |
| mmu-miR-26b       | -1.45396                    | -2.19457           | -1.07126                  |
| mmu-miR-106b      | -1.15334                    | 1.03817            | -1.22039                  |
| mmu-miR-19a       | 1.30646                     | 1.34478            | -1.21508                  |
| mmu-miR-669f      | -3.89756                    | -1.26188           | -1.13973                  |
| mmu-miR-30d       | -1.16327                    | -1.17778           | -1.1614                   |
| mmu-miR-20a/b     | 1.17816                     | -1.15987           | 1.00719                   |
| mmu-miR-151-3p    | 2.1597                      | 1.46293            | 1.39877                   |
| mmu-miR-297c      | 1.44329                     | 2.71667            | 1.35083                   |
| mmu-miR-29c       | 1.65757                     | -1.26198           | 1.17455                   |
| mmu-miR-30e       | -1.72096                    | -1.56805           | -1.34223                  |
| mmu-miR-151-5p    | 2.12685                     | 1.26771            | 1.35749                   |
| mmu-miR-19b       | 1.55759                     | 1.49099            | 1.08504                   |
| mmu-miR-155       | 1.03319                     | -2.25876           | -2.0728                   |
| mmu-miR-467f      | -2.41647                    | -1.41493           | 1.06179                   |
| mmu-miR-378       | -1.61162                    | -1.83553           | -1.57119                  |
| mmu-miR-466a/b-3p | -5.8748                     | -1.87003           | -1.83297                  |
| mmu-miR-146a      | 1.03512                     | 1.09331            | -1.14623                  |
| mmu-miR-145       | -1.22838                    | 1.34389            | -1.7565                   |
| mmu-miR-10a       | -1.41813                    | -1.33837           | -1.41529                  |

|                        |          |          |          |
|------------------------|----------|----------|----------|
| <b>mmu-miR-191</b>     | 1.20741  | -1.15287 | 1.04192  |
| <b>mmu-miR-27a</b>     | 1.23184  | 1.08216  | 1.10734  |
| <b>mmu-miR-140</b>     | -1.90049 | -1.59822 | -1.45115 |
| <b>mmu-miR-23b</b>     | 1.53963  | -1.26188 | 1.29325  |
| <b>mmu-miR-361</b>     | 2.00927  | -2.52426 | 1.05081  |
| <b>mmu-miR-22</b>      | 1.24474  | 1.4968   | 1.44119  |
| <b>mmu-miR-26a</b>     | -1.17534 | 1.15974  | 1.0645   |
| <b>mmu-miR-2183</b>    | -1.14149 | 1.53836  | 1.2839   |
| <b>mmu-miR-423-5p</b>  | -1.42474 | -2.40312 | -1.0999  |
| <b>mmu-miR-30c</b>     | 1.04706  | -1.21548 | 1.00713  |
| <b>mmu-miR-466g</b>    | -1.27593 | -1.06548 | 1.07187  |
| <b>mmu-miR-547</b>     | -1.49571 | 1.44307  | 1.29876  |
| <b>mmu-miR-338-5p</b>  | 1.13483  | 1.00861  | -1.62015 |
| <b>mmu-let-7i</b>      | 1.60413  | 1.20827  | 1.00162  |
| <b>mmu-miR-883b-3p</b> | 1.58813  | 3.16969  | 1.64827  |
| <b>mmu-miR-103</b>     | 1.16792  | -1.0725  | 1.45481  |
| <b>mmu-miR-374</b>     | 2.48925  | 2.11304  | 1.72402  |
| <b>mmu-miR-30a</b>     | -1.17488 | -1.07511 | 1.07523  |
| <b>mmu-miR-1949</b>    | -3.8752  | -1.98218 | -1.5119  |
| <b>mmu-miR-345-3p</b>  | 1.07307  | 2.58462  | 1.26491  |
| <b>mmu-miR-101b</b>    | 2.05917  | 1.50131  | -1.08846 |
| <b>mmu-miR-340-5p</b>  | -1.67843 | 1.06984  | 1.30964  |
| <b>mmu-miR-544</b>     | 1.05357  | 1.69865  | -1.4435  |
| <b>mmu-miR-423-3p</b>  | 1.46465  | 1.58477  | 1.21208  |
| <b>mmu-miR-200b</b>    | 1.06385  | 1.78321  | 1.63697  |
| <b>mmu-miR-98</b>      | -1.10431 | 1.15026  | 1.03228  |
| <b>mmu-miR-148b</b>    | -1.22254 | -1.56198 | -1.11677 |
| <b>mmu-miR-669i</b>    | 1.05087  | 1.11846  | 1.11192  |
| <b>mmu-miR-148a</b>    | 3.59669  | 2.77345  | 1.01385  |
| <b>mmu-miR-484</b>     | 1.27595  | 1.10914  | 1.06672  |
| <b>mmu-miR-139-5p</b>  | -4.02905 | 1.38671  | 1.1519   |
| <b>mmu-miR-301a</b>    | 1.5655   | 1.4266   | 1.22195  |
| <b>mmu-miR-135b</b>    | -1.48886 | -1.33275 | -1.00523 |
| <b>mmu-miR-376a</b>    | 1.51693  | 1.44707  | 1.45513  |
| <b>mmu-miR-489</b>     | 1.33716  | 2.2074   | -1.20276 |
| <b>mmu-miR-876-3p</b>  | 1.33716  | 1.69815  | -1.37501 |
| <b>mmu-miR-132</b>     | 1.46216  | -2.6923  | -1.83298 |
| <b>mmu-miR-23a</b>     | -1.08255 | 1.05278  | 1.24678  |
| <b>mmu-miR-539</b>     | -1.12584 | 1.86082  | 1.26491  |
| <b>mmu-miR-93</b>      | 1.61681  | 2.61558  | 1.60074  |
| <b>mmu-miR-125a-5p</b> | 2.20878  | -2.47109 | 1.08335  |
| <b>mmu-miR-130b</b>    | 1.85674  | 1.0809   | -1.25973 |
| <b>mmu-let-7e</b>      | 1.5314   | -1.16869 | -1.22755 |

|                     |          |          |          |
|---------------------|----------|----------|----------|
| <b>mmu-miR-350</b>  | -1.67911 | -1.57765 | -1.03144 |
| <b>mmu-miR-24</b>   | 1.41813  | 1.05664  | -1.17839 |
| <b>mmu-miR-107</b>  | -1.05358 | 1.09744  | 1.23099  |
| <b>mmu-miR-1902</b> | 1.98491  | 1.32052  | 2.34317  |
| <b>mmu-miR-96</b>   | 3.08417  | 4.30809  | 1.63629  |

\*Fold changes for miRNAs with Nanostring counts that passed the minimum intensity filter. miRNAs are ordered by rows according to expression in C57BL/6 naïve CD4<sup>+</sup> T cells beginning with highest expression on the top. LAT Y136F indicates LAT Y136F CD4<sup>+</sup> T cells, B6 HP indicates C57BL/6 CD4<sup>+</sup> T cells undergoing homeostatic proliferation, B6 H poly indicates C57BL/6 CD4<sup>+</sup> T cells from *H. polygyrus*-infected mice and B6 memory indicates C57BL/6 CD4<sup>+</sup> T cells that are also CD44<sup>hi</sup>CD62L<sup>lo</sup>.
