# Supplementary material for: miRNA Signature of Mouse Helper T Cell Hyper-Proliferation
Source: PubMed Central journal article supplement (PMC3692518; doi:10.1371/journal.pone.0066709), 2013-06-25
Supplement: pone.0066709.s008.pdf [file pone.0066709.s008.pdf]

Table S3. miRNAs levels as determined by Taqman analysis\*

| miRNA        | Comparison      | 2 way anova p value | miRNA        | Group  | 1 way anova p value |
|--------------|-----------------|---------------------|--------------|--------|---------------------|
| mmu-miR-21   | KI vs naïve     | 1.81386E-17         | mmu-miR-21   | KI     | 0.13715             |
| mmu-miR-21   | memory vs naïve | 1.07484E-15         | mmu-miR-21   | memory | 0.54437             |
| mmu-miR-21   | KI vs memory    | 0.13994             | mmu-miR-21   | naïve  | 0.86858             |
| mmu-miR-146a | KI vs naïve     | 8.92468E-13         | mmu-miR-146a | KI     | 0.03030             |
| mmu-miR-146a | memory vs naïve | 1.29963E-10         | mmu-miR-146a | memory | 0.85952             |
| mmu-miR-146a | KI vs memory    | 0.00909             | mmu-miR-146a | naïve  | 0.86858             |
| mmu-miR-148a | KI vs naïve     | 2.1743E-13          | mmu-miR-148a | KI     | 0.00735             |
| mmu-miR-148a | memory vs naïve | 1.80176E-09         | mmu-miR-148a | memory | 0.01989             |
| mmu-miR-148a | KI vs memory    | 1.52622E-07         | mmu-miR-148a | naïve  | 0.00396             |
| mmu-miR-181a | KI vs naïve     | 4.42683E-10         | mmu-miR-181a | KI     | 0.83198             |
| mmu-miR-181a | memory vs naïve | 0.02910             | mmu-miR-181a | memory | 0.14382             |
| mmu-miR-181a | KI vs memory    | 1.91845E-10         | mmu-miR-181a | naïve  | 0.34122             |

\*Fold changes were compared among groups using 2 way anova with Fcrit for  $\alpha=0.05$  and fold changes were compared within groups using 1 way anova with Fcrit for  $\alpha=0.05$ . KI denotes LAT Y136F CD4<sup>+</sup> T cells and naïve and memory CD4<sup>+</sup> T cells are from C57BL/6 (wild type) mice.
