# Supplementary material for: miRNA Signature of Mouse Helper T Cell Hyper-Proliferation
Source: PubMed Central journal article supplement (PMC3692518; doi:10.1371/journal.pone.0066709), 2013-06-25
Supplement: pone.0066709.s009.pdf [file pone.0066709.s009.pdf]

Table S4. Fold changes of miRNAs among three proliferative model systems\*

| miRNA                    | LAT Y136F<br>vs HP | LATY136F<br>vs H poly | HP vs H poly |
|--------------------------|--------------------|-----------------------|--------------|
| <b>mmu-miR-150</b>       | 2.05125            | 1.45025               | -1.41441     |
| <b>mmu-miR-181a</b>      | -1.24194           | -17.0887              | -13.7597     |
| <b>mmu-miR-669f</b>      | -3.08868           | -3.41972              | -1.10718     |
| <b>mmu-miR-29c</b>       | 2.09182            | 1.41124               | -1.48226     |
| <b>mmu-miR-155</b>       | 2.33373            | 2.1416                | -1.08971     |
| <b>mmu-miR-467f</b>      | -1.70784           | -2.56578              | -1.50236     |
| <b>mmu-miR-466a/b-3p</b> | -3.14156           | -3.20508              | -1.02022     |
| <b>mmu-miR-361</b>       | 5.07191            | 1.91212               | -2.65251     |
| <b>mmu-miR-547</b>       | -2.15841           | -1.94257              | 1.11111      |
| <b>mmu-miR-1949</b>      | -1.95502           | -2.56314              | -1.31106     |
| <b>mmu-miR-345-3p</b>    | -2.40861           | -1.17877              | 2.04333      |
| <b>mmu-miR-101b</b>      | 1.37158            | 2.24132               | 1.63412      |
| <b>mmu-miR-340-5p</b>    | -1.79564           | -2.19813              | -1.22415     |
| <b>mmu-miR-148a</b>      | 1.29683            | 3.54754               | 2.73555      |
| <b>mmu-miR-139-5p</b>    | -5.58714           | -4.64108              | 1.20385      |
| <b>mmu-miR-132</b>       | 3.93657            | 2.68011               | -1.46881     |
| <b>mmu-miR-539</b>       | -2.09499           | -1.42408              | 1.47111      |
| <b>mmu-miR-125a-5p</b>   | 5.4581             | 2.03884               | -2.67706     |
| <b>mmu-miR-130b</b>      | 1.71777            | 2.339                 | 1.36164      |

\*Fold differences of miRNAs with Nanostring counts that passed the minimum intensity filter. miRNAs are ordered by rows according to expression in C57BL/6 naïve CD4<sup>+</sup> T cells beginning with highest expression on the top. LAT Y136F indicates LAT Y136F CD4<sup>+</sup> T cells, B6 HP indicates C57BL/6 CD4<sup>+</sup> T cells undergoing homeostatic proliferation and B6 H poly indicates C57BL/6 CD4<sup>+</sup> T cells from *H. polygyrus*-infected mice.
