# Supplementary material for: miRNA Signature of Mouse Helper T Cell Hyper-Proliferation
Source: PubMed Central journal article supplement (PMC3692518; doi:10.1371/journal.pone.0066709), 2013-06-25
Supplement: pone.0066709.s010.pdf [file pone.0066709.s010.pdf]

Table S5. Log2 expression levels of miRNAs\*

| miRNA             | B6<br>naive | B6 HP   | LATY136F | B6 H<br>poly | B6<br>memory |
|-------------------|-------------|---------|----------|--------------|--------------|
| mmu-miR-30d       | 6.45154     | 6.07318 | 6.09107  | 6.09339      | 6.30925      |
| mmu-miR-378       | 5.81609     | 4.40327 | 4.59096  | 4.62761      | 5.27947      |
| mmu-miR-10a       | 5.50048     | 4.40327 | 4.31976  | 4.32265      | 4.82375      |
| mmu-miR-140       | 5.33056     | 5.26604 | 5.01614  | 5.40531      | 5.94251      |
| mmu-let-7g        | 9.67753     | 9.24776 | 9.17587  | 9.63414      | 9.75261      |
| mmu-miR-135b      | 3.91552     | 3.52857 | 3.36877  | 3.93546      | 3.94298      |
| mmu-miR-181a      | 7.66683     | 2.94486 | 2.63227  | 6.72724      | 6.76075      |
| mmu-miR-15b       | 10.0571     | 9.27041 | 8.96942  | 9.66377      | 10.5052      |
| mmu-miR-16        | 10.9628     | 10.5932 | 10.5438  | 10.7842      | 11.2913      |
| mmu-miR-30e       | 6.07468     | 5.40327 | 5.26903  | 5.62761      | 6.05224      |
| mmu-miR-467f      | 5.89118     | 4.40327 | 3.6311   | 4.9905       | 4.904        |
| mmu-miR-30a       | 4.81609     | 4.11353 | 3.9855   | 4.32265      | 4.21801      |
| mmu-miR-669f      | 6.54782     | 5.33628 | 3.70929  | 5.48317      | 5.67186      |
| mmu-miR-466a/b-3p | 5.65249     | 4.11353 | 2.46205  | 4.14241      | 5.01659      |
| mmu-miR-1949      | 4.76341     | 3.75168 | 2.7845   | 4.14241      | 4.73877      |
| mmu-miR-340-5p    | 4.59335     | 4.11353 | 3.26903  | 4.40531      | 4.01614      |
| mmu-miR-466g      | 5.05311     | 4.851   | 4.59096  | 5.04264      | 4.94251      |
| mmu-miR-150       | 12.7606     | 11.286  | 12.3225  | 11.7862      | 11.187       |
| mmu-miR-151-5p    | 6.031       | 4.94392 | 5.69042  | 5.04264      | 4.6017       |
| mmu-miR-151-3p    | 6.19849     | 4.94392 | 5.50589  | 4.87922      | 4.39506      |
| mmu-let-7b        | 7.01992     | 5.58796 | 5.854    | 6.44493      | 5.67186      |
| mmu-miR-30c       | 5.09592     | 4.11353 | 4.4614   | 4.40531      | 4.39506      |
| mmu-miR-669i      | 4.33056     | 3.94392 | 3.854    | 3.93546      | 3.78241      |
| mmu-miR-361       | 5.25663     | 3.52857 | 5.8711   | 4.93593      | 4.86443      |
| mmu-miR-20a/b     | 6.43496     | 5.98846 | 6.43896  | 6.21276      | 6.20242      |
| mmu-miR-342-3p    | 6.97441     | 5.75141 | 6.49506  | 7.31225      | 6.46287      |
| mmu-miR-29a       | 9.14308     | 8.30154 | 8.84962  | 9.16614      | 8.94017      |
| mmu-miR-142-3p    | 12.579      | 11.7088 | 12.1089  | 12.2736      | 12.104       |
| mmu-miR-30b       | 8.45574     | 7.1534  | 8.06151  | 8.06194      | 7.94257      |
| mmu-let-7f        | 7.77683     | 6.72533 | 7.51688  | 7.51152      | 7.46279      |
| mmu-let-7c        | 7.7021      | 5.64443 | 6.63154  | 6.8936       | 7.06964      |
| mmu-miR-148b      | 4.33056     | 3.75168 | 4.10518  | 4.23573      | 4.39506      |
| mmu-miR-26b       | 6.85412     | 5.46761 | 6.06156  | 6.50224      | 6.60155      |
| mmu-miR-423-5p    | 5.09592     | 3.75168 | 4.50589  | 4.87922      | 5.01659      |
| mmu-miR-139-5p    | 4.17871     | 4.75114 | 2.26903  | 4.48349      | 4.27947      |
| mmu-miR-2183      | 5.09592     | 5.40327 | 4.59096  | 5.14241      | 4.78188      |
| mmu-miR-547       | 5.05311     | 5.03122 | 3.92125  | 4.87922      | 4.50208      |
| mmu-miR-26a       | 5.13791     | 5.26604 | 4.81916  | 5.14241      | 5.05224      |
| mmu-miR-883b-3p   | 4.96301     | 5.26604 | 4.26903  | 4.32265      | 3.6017       |

|                        |         |         |         |         |         |
|------------------------|---------|---------|---------|---------|---------|
| <b>mmu-miR-297c</b>    | 6.17852 | 6.94392 | 6.03144 | 5.93593 | 5.50208 |
| <b>mmu-miR-345-3p</b>  | 4.70929 | 5.58796 | 4.31976 | 4.55704 | 4.21801 |
| <b>mmu-miR-93</b>      | 3.81558 | 5.40327 | 4.70929 | 4.69488 | 4.01614 |
| <b>mmu-miR-25</b>      | 7.28475 | 7.51381 | 7.3258  | 7.37495 | 7.24916 |
| <b>mmu-miR-539</b>     | 3.91552 | 5.11395 | 4.04701 | 4.55704 | 4.21801 |
| <b>mmu-miR-98</b>      | 4.46793 | 4.851   | 4.50589 | 4.69488 | 4.64904 |
| <b>mmu-miR-200b</b>    | 4.59335 | 5.11395 | 4.36877 | 4.9905  | 4.27947 |
| <b>mmu-miR-106b</b>    | 6.70901 | 7.05246 | 6.7926  | 6.71108 | 6.99842 |
| <b>mmu-miR-19b</b>     | 5.96278 | 6.1534  | 6.21645 | 5.69488 | 5.57713 |
| <b>mmu-miR-101b</b>    | 4.65249 | 4.5292  | 4.98504 | 3.82069 | 3.94298 |
| <b>mmu-miR-423-3p</b>  | 4.59335 | 4.5292  | 4.41549 | 4.14241 | 3.86493 |
| <b>mmu-miR-489</b>     | 3.91552 | 4.64443 | 3.92125 | 3.23573 | 3.50208 |
| <b>mmu-miR-876-3p</b>  | 3.91552 | 4.26604 | 3.92125 | 3.04264 | 3.50208 |
| <b>mmu-miR-19a</b>     | 6.59365 | 6.75128 | 6.70957 | 6.04286 | 6.32391 |
| <b>mmu-miR-145</b>     | 5.62322 | 5.64443 | 4.92125 | 4.40531 | 5.21801 |
| <b>mmu-miR-544</b>     | 4.59335 | 4.851   | 4.16189 | 3.55704 | 4.08661 |
| <b>mmu-miR-338-5p</b>  | 5.05311 | 4.75114 | 4.92125 | 4.04264 | 4.73877 |
| <b>mmu-miR-130b</b>    | 3.70929 | 4.26604 | 5.04658 | 3.82069 | 4.15381 |
| <b>mmu-let-7e</b>      | 3.70929 | 4.11353 | 4.95327 | 4.04264 | 4.33842 |
| <b>mmu-miR-155</b>     | 5.96278 | 7.13381 | 8.35645 | 7.25776 | 8.30934 |
| <b>mmu-miR-125a-5p</b> | 3.81558 | 3.94392 | 6.39232 | 5.36457 | 5.24907 |
| <b>mmu-miR-191</b>     | 5.50048 | 5.69877 | 6.17592 | 5.96324 | 5.904   |
| <b>mmu-miR-29c</b>     | 6.13791 | 6.4358  | 7.50056 | 7.0036  | 6.77149 |
| <b>mmu-miR-23b</b>     | 5.33056 | 5.33628 | 6.29444 | 6.04286 | 5.67186 |
| <b>mmu-miR-132</b>     | 3.91552 | 3.26604 | 5.24298 | 3.82069 | 4.69488 |
| <b>mmu-miR-29b</b>     | 9.19103 | 9.03144 | 9.78467 | 9.69893 | 9.71282 |
| <b>mmu-let-7a</b>      | 8.67398 | 8.3786  | 8.81256 | 8.88286 | 8.87949 |
| <b>mmu-miR-374</b>     | 4.86641 | 5.52888 | 5.76527 | 5.23534 | 4.44956 |
| <b>mmu-miR-103</b>     | 4.96301 | 5.26604 | 5.59096 | 5.90785 | 5.36702 |
| <b>mmu-miR-376a</b>    | 3.91552 | 4.75114 | 4.81916 | 4.75916 | 4.21801 |
| <b>mmu-miR-1902</b>    | 2.81558 | 4.26604 | 4.854   | 5.09339 | 3.86493 |
| <b>mmu-miR-23a</b>     | 3.91552 | 5.89821 | 5.70957 | 6.14221 | 5.824   |
| <b>mmu-miR-107</b>     | 3.00899 | 4.5292  | 4.31976 | 4.69488 | 4.39506 |
| <b>mmu-miR-22</b>      | 5.25663 | 7.03144 | 6.7654  | 6.97682 | 6.44956 |
| <b>mmu-miR-146a</b>    | 5.65249 | 10.3341 | 10.2552 | 10.0085 | 10.2054 |
| <b>mmu-miR-21</b>      | 7.7021  | 11.9705 | 12.2323 | 11.4491 | 11.6313 |
| <b>mmu-miR-27a</b>     | 5.40088 | 6.87467 | 7.06156 | 6.90785 | 6.76075 |
| <b>mmu-miR-15a</b>     | 7.27547 | 8.75131 | 8.55175 | 8.30688 | 8.17438 |
| <b>mmu-miR-148a</b>    | 4.25626 | 7.21072 | 7.58571 | 5.75889 | 5.73904 |
| <b>mmu-miR-106a+17</b> | 7.42652 | 7.96636 | 7.89627 | 7.65328 | 7.70023 |
| <b>mmu-miR-301a</b>    | 4.00899 | 4.851   | 4.98504 | 4.62761 | 4.33842 |
| <b>mmu-miR-96</b>      | 2.81558 | 5.80193 | 5.31976 | 4.40531 | 3.69488 |
| <b>mmu-miR-24</b>      | 3.59335 | 4.94392 | 5.36842 | 4.62761 | 4.86443 |

|                    |         |         |         |         |         |
|--------------------|---------|---------|---------|---------|---------|
| <b>mmu-let-7i</b>  | 5.05311 | 5.89821 | 6.30706 | 5.62761 | 5.62527 |
| <b>mmu-miR-484</b> | 4.17871 | 4.75114 | 4.95327 | 4.69488 | 4.6017  |
| <b>mmu-let-7d</b>  | 7.27547 | 7.6164  | 7.43888 | 7.63626 | 7.63713 |
| <b>mmu-miR-350</b> | 3.59335 | 3.94392 | 3.854   | 4.55704 | 4.6017  |

\*Log2 transformation of Nanostring counts for the 86 miRNAs which passed the minimum intensity filter and for which there were >2 fold differences between any of the samples. The order of rows corresponds to the clustering depicted in Figure 3. B6 naïve T cells are C57BL/6 CD4<sup>+</sup> T cells that are also CD44<sup>lo</sup>CD62L<sup>hi</sup> and B6 memory T cells are C57BL/6 CD4<sup>+</sup> T cells that are also CD44<sup>hi</sup>CD62L<sup>lo</sup>. LAT Y136F indicates LAT Y136F CD4<sup>+</sup> T cells, B6 HP indicates C57BL/6 CD4<sup>+</sup> T cells undergoing homeostatic proliferation and B6 H poly indicates C57BL/6 CD4<sup>+</sup> T cells from *H. polygyrus*-infected mice.
