# Supplementary material for: miRNA Signature of Mouse Helper T Cell Hyper-Proliferation
Source: PubMed Central journal article supplement (PMC3692518; doi:10.1371/journal.pone.0066709), 2013-06-25
Supplement: pone.0066709.s012.pdf [file pone.0066709.s012.pdf]

Table S7. Nanostring analysis counts of microRNAs from C57BL/6 naïve CD4<sup>+</sup> T cells\*

| <b>miRNA</b>    | <b>B6 naive</b> |
|-----------------|-----------------|
| mmu-miR-720     | 15,938.21       |
| mmu-miR-150     | 6,939.45        |
| mmu-miR-142-3p  | 6,118.55        |
| mmu-miR-16      | 1,995.92        |
| mmu-miR-1937a+b | 1,465.76        |
| mmu-miR-15b     | 1,065.36        |
| mmu-let-7g      | 818.892         |
| mmu-miR-29b     | 584.492         |
| mmu-miR-29a     | 565.377         |
| mmu-miR-1937c   | 534.191         |
| mmu-miR-1944    | 468.8           |
| mmu-let-7a      | 408.44          |
| mmu-miR-30b     | 351.097         |
| mmu-let-7f      | 219.31          |
| mmu-let-7c      | 208.244         |
| mmu-miR-21      | 208.244         |
| mmu-miR-181a    | 203.214         |
| mmu-miR-106a+17 | 172.028         |
| mmu-miR-25      | 155.931         |
| mmu-let-7d      | 154.925         |
| mmu-miR-15a     | 154.925         |
| mmu-let-7b      | 129.775         |
| mmu-miR-342-3p  | 125.751         |
| mmu-miR-26b     | 115.691         |
| mmu-miR-106b    | 104.625         |
| mmu-miR-19a     | 96.577          |
| mmu-miR-669f    | 93.559          |
| mmu-miR-30d     | 87.523          |
| mmu-miR-20a+b   | 86.517          |
| mmu-miR-151-3p  | 73.439          |
| mmu-miR-297c    | 72.433          |
| mmu-miR-29c     | 70.421          |
| mmu-miR-30e     | 67.403          |
| mmu-miR-151-5p  | 65.391          |
| mmu-miR-155     | 62.373          |
| mmu-miR-19b     | 62.373          |
| mmu-miR-741     | 61.367          |
| mmu-miR-467f    | 59.355          |

|                           |        |
|---------------------------|--------|
| mmu-miR-378               | 56.337 |
| mmu-miR-146a              | 50.3   |
| mmu-miR-466a-3p+466b-3-3p | 50.3   |
| mmu-miR-145               | 49.294 |
| mmu-miR-10a               | 45.27  |
| mmu-miR-191               | 45.27  |
| mmu-miR-27a               | 42.252 |
| mmu-miR-140               | 40.24  |
| mmu-miR-23b               | 40.24  |
| mmu-miR-22                | 38.228 |
| mmu-miR-361               | 38.228 |
| mmu-miR-26a               | 35.21  |
| mmu-miR-2183              | 34.204 |
| mmu-miR-30c               | 34.204 |
| mmu-miR-423-5p            | 34.204 |
| mmu-let-7i                | 33.198 |
| mmu-miR-338-5p            | 33.198 |
| mmu-miR-466g              | 33.198 |
| mmu-miR-547               | 33.198 |
| mmu-miR-103               | 31.186 |
| mmu-miR-883b-3p           | 31.186 |
| mmu-miR-374               | 29.174 |
| mmu-miR-30a               | 28.168 |
| mmu-miR-1949              | 27.162 |
| mmu-miR-219               | 26.156 |
| mmu-miR-345-3p            | 26.156 |
| mmu-miR-467e              | 26.156 |
| mmu-miR-467h+669d+669l    | 26.156 |
| mmu-miR-669a              | 26.156 |
| mmu-miR-101b              | 25.15  |
| mmu-miR-200b              | 24.144 |
| mmu-miR-340-5p            | 24.144 |
| mmu-miR-423-3p            | 24.144 |
| mmu-miR-544               | 24.144 |
| mmu-miR-425               | 23.138 |
| mmu-miR-467b              | 22.132 |
| mmu-miR-98                | 22.132 |
| mmu-miR-28                | 21.126 |
| mmu-miR-148b              | 20.12  |
| mmu-miR-669i              | 20.12  |

|                 |        |
|-----------------|--------|
| mmu-miR-743a    | 20.12  |
| mmu-miR-148a    | 19.114 |
| mmu-miR-2146    | 19.114 |
| mmu-miR-467a    | 19.114 |
| mmu-miR-139-5p  | 18.108 |
| mmu-miR-3472    | 18.108 |
| mmu-miR-484     | 18.108 |
| mmu-miR-33      | 17.102 |
| mmu-miR-448     | 17.102 |
| mmu-miR-466d-3p | 17.102 |
| mmu-miR-670     | 17.102 |
| mmu-miR-101a    | 16.096 |
| mmu-miR-181c    | 16.096 |
| mmu-miR-301a    | 16.096 |
| mmu-miR-344     | 16.096 |
| mmu-miR-409-5p  | 16.096 |
| mmu-miR-122     | 15.09  |
| mmu-miR-132     | 15.09  |
| mmu-miR-135b    | 15.09  |
| mmu-miR-1839-3p | 15.09  |
| mmu-miR-23a     | 15.09  |
| mmu-miR-323-5p  | 15.09  |
| mmu-miR-376a    | 15.09  |
| mmu-miR-465b-5p | 15.09  |
| mmu-miR-489     | 15.09  |
| mmu-miR-539     | 15.09  |
| mmu-miR-678     | 15.09  |
| mmu-miR-872     | 15.09  |
| mmu-miR-876-3p  | 15.09  |
| mmu-miR-1193    | 14.084 |
| mmu-miR-124     | 14.084 |
| mmu-miR-125a-5p | 14.084 |
| mmu-miR-1962    | 14.084 |
| mmu-miR-3471    | 14.084 |
| mmu-miR-93      | 14.084 |
| mmu-let-7e      | 13.078 |
| mmu-miR-130b    | 13.078 |
| mmu-miR-136     | 13.078 |
| mmu-miR-153     | 13.078 |
| mmu-miR-181b+d  | 13.078 |
| mmu-miR-1893    | 13.078 |

|                        |        |
|------------------------|--------|
| mmu-miR-1940           | 13.078 |
| mmu-miR-1959           | 13.078 |
| mmu-miR-2132           | 13.078 |
| mmu-miR-297a+466f+669b | 13.078 |
| mmu-miR-323-3p         | 13.078 |
| mmu-miR-669j           | 13.078 |
| mmu-miR-695            | 13.078 |
| mmu-miR-1906           | 12.072 |
| mmu-miR-24             | 12.072 |
| mmu-miR-27b            | 12.072 |
| mmu-miR-329            | 12.072 |
| mmu-miR-350            | 12.072 |
| mmu-miR-383            | 12.072 |
| mmu-miR-450a-5p        | 12.072 |
| mmu-miR-669o           | 12.072 |
| mmu-miR-141            | 11.066 |
| mmu-miR-1939           | 11.066 |
| mmu-miR-202-3p         | 11.066 |
| mmu-miR-202-5p         | 11.066 |
| mmu-miR-206            | 11.066 |
| mmu-miR-325            | 11.066 |
| mmu-miR-365            | 11.066 |
| mmu-miR-532-5p         | 11.066 |
| mmu-miR-669h-5p        | 11.066 |
| mmu-miR-683            | 11.066 |
| mmu-miR-742            | 11.066 |
| mmu-miR-761            | 11.066 |
| mmu-miR-1187           | 10.06  |
| mmu-miR-1194           | 10.06  |
| mmu-miR-135a           | 10.06  |
| mmu-miR-144            | 10.06  |
| mmu-miR-186            | 10.06  |
| mmu-miR-188-5p         | 10.06  |
| mmu-miR-196b           | 10.06  |
| mmu-miR-201            | 10.06  |
| mmu-miR-291b-3p        | 10.06  |
| mmu-miR-338-3p         | 10.06  |
| mmu-miR-380-5p         | 10.06  |
| mmu-miR-452            | 10.06  |
| mmu-miR-485            | 10.06  |
| mmu-miR-488            | 10.06  |

|                         |       |
|-------------------------|-------|
| mmu-miR-496             | 10.06 |
| mmu-miR-652             | 10.06 |
| mmu-miR-690             | 10.06 |
| mmu-miR-759             | 10.06 |
| mmu-miR-881             | 10.06 |
| mmu-miR-1839-5p         | 9.054 |
| mmu-miR-1929            | 9.054 |
| mmu-miR-193b            | 9.054 |
| mmu-miR-1961            | 9.054 |
| mmu-miR-1963            | 9.054 |
| mmu-miR-199a-3p         | 9.054 |
| mmu-miR-211             | 9.054 |
| mmu-miR-2141            | 9.054 |
| mmu-miR-302a            | 9.054 |
| mmu-miR-322             | 9.054 |
| mmu-miR-3475            | 9.054 |
| mmu-miR-369-3p          | 9.054 |
| mmu-miR-410             | 9.054 |
| mmu-miR-421             | 9.054 |
| mmu-miR-465a-3p         | 9.054 |
| mmu-miR-466a-5p+466e-5p | 9.054 |
| mmu-miR-467c            | 9.054 |
| mmu-miR-483             | 9.054 |
| mmu-miR-493             | 9.054 |
| mmu-miR-551b            | 9.054 |
| mmu-miR-574-3p          | 9.054 |
| mmu-miR-574-5p          | 9.054 |
| mmu-miR-7a              | 9.054 |
| mmu-miR-875-5p          | 9.054 |
| mmu-miR-107             | 8.048 |
| mmu-miR-128             | 8.048 |
| mmu-miR-133a            | 8.048 |
| mmu-miR-152             | 8.048 |
| mmu-miR-1895            | 8.048 |
| mmu-miR-1901            | 8.048 |
| mmu-miR-194             | 8.048 |
| mmu-miR-1941-3p         | 8.048 |
| mmu-miR-1943            | 8.048 |
| mmu-miR-1950            | 8.048 |
| mmu-miR-1953            | 8.048 |
| mmu-miR-1960            | 8.048 |

|                 |       |
|-----------------|-------|
| mmu-miR-200c    | 8.048 |
| mmu-miR-204     | 8.048 |
| mmu-miR-207     | 8.048 |
| mmu-miR-2138    | 8.048 |
| mmu-miR-2139    | 8.048 |
| mmu-miR-2145    | 8.048 |
| mmu-miR-216b    | 8.048 |
| mmu-miR-223     | 8.048 |
| mmu-miR-290-3p  | 8.048 |
| mmu-miR-302d    | 8.048 |
| mmu-miR-3072    | 8.048 |
| mmu-miR-31      | 8.048 |
| mmu-miR-326     | 8.048 |
| mmu-miR-328     | 8.048 |
| mmu-miR-339-3p  | 8.048 |
| mmu-miR-339-5p  | 8.048 |
| mmu-miR-345-5p  | 8.048 |
| mmu-miR-3474    | 8.048 |
| mmu-miR-367     | 8.048 |
| mmu-miR-375     | 8.048 |
| mmu-miR-380-3p  | 8.048 |
| mmu-miR-450b-5p | 8.048 |
| mmu-miR-455     | 8.048 |
| mmu-miR-463     | 8.048 |
| mmu-miR-468     | 8.048 |
| mmu-miR-470     | 8.048 |
| mmu-miR-501-5p  | 8.048 |
| mmu-miR-511     | 8.048 |
| mmu-miR-669e    | 8.048 |
| mmu-miR-706     | 8.048 |
| mmu-miR-744     | 8.048 |
| mmu-miR-770-3p  | 8.048 |
| mmu-miR-873     | 8.048 |
| mmu-miR-883a-3p | 8.048 |
| mmu-miR-92a     | 8.048 |
| mmu-miR-99a     | 8.048 |
| mmu-miR-125a-3p | 7.042 |
| mmu-miR-154     | 7.042 |
| mmu-miR-190     | 7.042 |
| mmu-miR-1902    | 7.042 |
| mmu-miR-1928    | 7.042 |

|                 |       |
|-----------------|-------|
| mmu-miR-1936    | 7.042 |
| mmu-miR-195     | 7.042 |
| mmu-miR-1957    | 7.042 |
| mmu-miR-1965    | 7.042 |
| mmu-miR-203     | 7.042 |
| mmu-miR-2137    | 7.042 |
| mmu-miR-2861    | 7.042 |
| mmu-miR-291a-3p | 7.042 |
| mmu-miR-296-5p  | 7.042 |
| mmu-miR-335-3p  | 7.042 |
| mmu-miR-337-3p  | 7.042 |
| mmu-miR-337-5p  | 7.042 |
| mmu-miR-34b-3p  | 7.042 |
| mmu-miR-362-3p  | 7.042 |
| mmu-miR-466d-5p | 7.042 |
| mmu-miR-467g    | 7.042 |
| mmu-miR-495     | 7.042 |
| mmu-miR-540-3p  | 7.042 |
| mmu-miR-541     | 7.042 |
| mmu-miR-664     | 7.042 |
| mmu-miR-668     | 7.042 |
| mmu-miR-669g    | 7.042 |
| mmu-miR-673-5p  | 7.042 |
| mmu-miR-674     | 7.042 |
| mmu-miR-677     | 7.042 |
| mmu-miR-688     | 7.042 |
| mmu-miR-694     | 7.042 |
| mmu-miR-710     | 7.042 |
| mmu-miR-717     | 7.042 |
| mmu-miR-719     | 7.042 |
| mmu-miR-762     | 7.042 |
| mmu-miR-770-5p  | 7.042 |
| mmu-miR-7b      | 7.042 |
| mmu-miR-96      | 7.042 |
| mmu-miR-1198    | 6.036 |
| mmu-miR-1306    | 6.036 |
| mmu-miR-146b    | 6.036 |
| mmu-miR-187     | 6.036 |
| mmu-miR-1897-3p | 6.036 |
| mmu-miR-1898    | 6.036 |
| mmu-miR-1903    | 6.036 |

|                 |       |
|-----------------|-------|
| mmu-miR-192     | 6.036 |
| mmu-miR-1935    | 6.036 |
| mmu-miR-1941-5p | 6.036 |
| mmu-miR-1942    | 6.036 |
| mmu-miR-1945    | 6.036 |
| mmu-miR-1964    | 6.036 |
| mmu-miR-200a    | 6.036 |
| mmu-miR-205     | 6.036 |
| mmu-miR-294     | 6.036 |
| mmu-miR-297b-3p | 6.036 |
| mmu-miR-324-5p  | 6.036 |
| mmu-miR-331-3p  | 6.036 |
| mmu-miR-342-5p  | 6.036 |
| mmu-miR-343     | 6.036 |
| mmu-miR-3473    | 6.036 |
| mmu-miR-34b-5p  | 6.036 |
| mmu-miR-382     | 6.036 |
| mmu-miR-384-5p  | 6.036 |
| mmu-miR-412     | 6.036 |
| mmu-miR-431     | 6.036 |
| mmu-miR-434-5p  | 6.036 |
| mmu-miR-449a    | 6.036 |
| mmu-miR-450b-3p | 6.036 |
| mmu-miR-464     | 6.036 |
| mmu-miR-466j    | 6.036 |
| mmu-miR-466k    | 6.036 |
| mmu-miR-499     | 6.036 |
| mmu-miR-500     | 6.036 |
| mmu-miR-542-3p  | 6.036 |
| mmu-miR-653     | 6.036 |
| mmu-miR-675-5p  | 6.036 |
| mmu-miR-696     | 6.036 |
| mmu-miR-708     | 6.036 |
| mmu-miR-713     | 6.036 |
| mmu-miR-743b-3p | 6.036 |
| mmu-miR-760     | 6.036 |
| mmu-miR-764-5p  | 6.036 |
| mmu-miR-802     | 6.036 |
| mmu-miR-875-3p  | 6.036 |
| mmu-miR-878-3p  | 6.036 |
| mmu-miR-879     | 6.036 |



|                 |      |
|-----------------|------|
| mmu-miR-1186    | 5.03 |
| mmu-miR-1186b   | 5.03 |
| mmu-miR-1224    | 5.03 |
| mmu-miR-125b-3p | 5.03 |
| mmu-miR-126-3p  | 5.03 |
| mmu-miR-1274a   | 5.03 |
| mmu-miR-129-3p  | 5.03 |
| mmu-miR-129-5p  | 5.03 |
| mmu-miR-143     | 5.03 |
| mmu-miR-149     | 5.03 |
| mmu-miR-184     | 5.03 |
| mmu-miR-1894-5p | 5.03 |
| mmu-miR-1896    | 5.03 |
| mmu-miR-18a     | 5.03 |
| mmu-miR-1905    | 5.03 |
| mmu-miR-1931    | 5.03 |
| mmu-miR-1946a   | 5.03 |
| mmu-miR-1966    | 5.03 |
| mmu-miR-1968    | 5.03 |
| mmu-miR-1969    | 5.03 |
| mmu-miR-1982    | 5.03 |
| mmu-miR-214     | 5.03 |
| mmu-miR-220     | 5.03 |
| mmu-miR-293     | 5.03 |
| mmu-miR-3099    | 5.03 |
| mmu-miR-331-5p  | 5.03 |
| mmu-miR-340-3p  | 5.03 |
| mmu-miR-341     | 5.03 |
| mmu-miR-346     | 5.03 |
| mmu-miR-377     | 5.03 |
| mmu-miR-409-3p  | 5.03 |
| mmu-miR-432     | 5.03 |
| mmu-miR-465a-5p | 5.03 |
| mmu-miR-466h    | 5.03 |
| mmu-miR-471     | 5.03 |
| mmu-miR-486     | 5.03 |
| mmu-miR-494     | 5.03 |
| mmu-miR-497     | 5.03 |
| mmu-miR-540-5p  | 5.03 |
| mmu-miR-543     | 5.03 |
| mmu-miR-582-3p  | 5.03 |

|                 |       |
|-----------------|-------|
| mmu-miR-590-5p  | 5.03  |
| mmu-miR-654-3p  | 5.03  |
| mmu-miR-667     | 5.03  |
| mmu-miR-704     | 5.03  |
| mmu-miR-718     | 5.03  |
| mmu-miR-764-3p  | 5.03  |
| mmu-miR-804     | 5.03  |
| mmu-miR-874     | 5.03  |
| mmu-miR-878-5p  | 5.03  |
| mmu-miR-882     | 5.03  |
| mmu-miR-883a-5p | 5.03  |
| mmu-miR-883b-5p | 5.03  |
| mmu-miR-92b     | 5.03  |
| mmu-miR-99b     | 5.03  |
| mmu-miR-1       | 4.024 |
| mmu-miR-105     | 4.024 |
| mmu-miR-1197    | 4.024 |
| mmu-miR-1199    | 4.024 |
| mmu-miR-125b-5p | 4.024 |
| mmu-miR-133b    | 4.024 |
| mmu-miR-147     | 4.024 |
| mmu-miR-182     | 4.024 |
| mmu-miR-183     | 4.024 |
| mmu-miR-1900    | 4.024 |
| mmu-miR-1907    | 4.024 |
| mmu-miR-190b    | 4.024 |
| mmu-miR-193     | 4.024 |
| mmu-miR-1933-5p | 4.024 |
| mmu-miR-1956    | 4.024 |
| mmu-miR-1983    | 4.024 |
| mmu-miR-199a-5p | 4.024 |
| mmu-miR-208b    | 4.024 |
| mmu-miR-2133    | 4.024 |
| mmu-miR-2135    | 4.024 |
| mmu-miR-2136    | 4.024 |
| mmu-miR-221     | 4.024 |
| mmu-miR-222     | 4.024 |
| mmu-miR-290-5p  | 4.024 |
| mmu-miR-291b-5p | 4.024 |
| mmu-miR-292-5p  | 4.024 |
| mmu-miR-295     | 4.024 |

|                 |       |
|-----------------|-------|
| mmu-miR-296-3p  | 4.024 |
| mmu-miR-298     | 4.024 |
| mmu-miR-300     | 4.024 |
| mmu-miR-301b    | 4.024 |
| mmu-miR-320     | 4.024 |
| mmu-miR-324-3p  | 4.024 |
| mmu-miR-3470a+b | 4.024 |
| mmu-miR-34a     | 4.024 |
| mmu-miR-351     | 4.024 |
| mmu-miR-369-5p  | 4.024 |
| mmu-miR-376b    | 4.024 |
| mmu-miR-379     | 4.024 |
| mmu-miR-411     | 4.024 |
| mmu-miR-449b    | 4.024 |
| mmu-miR-465c-5p | 4.024 |
| mmu-miR-466i    | 4.024 |
| mmu-miR-467d    | 4.024 |
| mmu-miR-532-3p  | 4.024 |
| mmu-miR-542-5p  | 4.024 |
| mmu-miR-546     | 4.024 |
| mmu-miR-568     | 4.024 |
| mmu-miR-582-5p  | 4.024 |
| mmu-miR-599     | 4.024 |
| mmu-miR-671-3p  | 4.024 |
| mmu-miR-676     | 4.024 |
| mmu-miR-684     | 4.024 |
| mmu-miR-686     | 4.024 |
| mmu-miR-689     | 4.024 |
| mmu-miR-692     | 4.024 |
| mmu-miR-693-3p  | 4.024 |
| mmu-miR-698     | 4.024 |
| mmu-miR-703     | 4.024 |
| mmu-miR-709     | 4.024 |
| mmu-miR-767     | 4.024 |
| mmu-miR-876-5p  | 4.024 |
| mmu-miR-880     | 4.024 |
| mmu-miR-10b     | 3.018 |
| mmu-miR-1188    | 3.018 |
| mmu-miR-1190    | 3.018 |
| mmu-miR-1191    | 3.018 |
| mmu-miR-126-5p  | 3.018 |

|                 |       |
|-----------------|-------|
| mmu-miR-127     | 3.018 |
| mmu-miR-130a    | 3.018 |
| mmu-miR-134     | 3.018 |
| mmu-miR-137     | 3.018 |
| mmu-miR-1892    | 3.018 |
| mmu-miR-1894-3p | 3.018 |
| mmu-miR-1927    | 3.018 |
| mmu-miR-1934    | 3.018 |
| mmu-miR-1938    | 3.018 |
| mmu-miR-1946b   | 3.018 |
| mmu-miR-1947    | 3.018 |
| mmu-miR-1951    | 3.018 |
| mmu-miR-1952    | 3.018 |
| mmu-miR-1967    | 3.018 |
| mmu-miR-1970    | 3.018 |
| mmu-miR-210     | 3.018 |
| mmu-miR-212     | 3.018 |
| mmu-miR-216a    | 3.018 |
| mmu-miR-217     | 3.018 |
| mmu-miR-292-3p  | 3.018 |
| mmu-miR-32      | 3.018 |
| mmu-miR-327     | 3.018 |
| mmu-miR-330     | 3.018 |
| mmu-miR-34c     | 3.018 |
| mmu-miR-381     | 3.018 |
| mmu-miR-384-3p  | 3.018 |
| mmu-miR-433     | 3.018 |
| mmu-miR-434-3p  | 3.018 |
| mmu-miR-451     | 3.018 |
| mmu-miR-453     | 3.018 |
| mmu-miR-466c-5p | 3.018 |
| mmu-miR-466l    | 3.018 |
| mmu-miR-469     | 3.018 |
| mmu-miR-487b    | 3.018 |
| mmu-miR-490     | 3.018 |
| mmu-miR-592     | 3.018 |
| mmu-miR-654-5p  | 3.018 |
| mmu-miR-697     | 3.018 |
| mmu-miR-707     | 3.018 |
| mmu-miR-711     | 3.018 |
| mmu-miR-712     | 3.018 |

|                 |       |
|-----------------|-------|
| mmu-miR-743b-5p | 3.018 |
| mmu-miR-758     | 3.018 |
| mmu-miR-871     | 3.018 |
| mmu-miR-877     | 3.018 |
| mmu-miR-1192    | 2.012 |
| mmu-miR-1195    | 2.012 |
| mmu-miR-1196    | 2.012 |
| mmu-miR-138     | 2.012 |
| mmu-miR-185     | 2.012 |
| mmu-miR-188-3p  | 2.012 |
| mmu-miR-1904    | 2.012 |
| mmu-miR-1932    | 2.012 |
| mmu-miR-1933-3p | 2.012 |
| mmu-miR-1955    | 2.012 |
| mmu-miR-1958    | 2.012 |
| mmu-miR-1971    | 2.012 |
| mmu-miR-1981    | 2.012 |
| mmu-miR-2134    | 2.012 |
| mmu-miR-2140    | 2.012 |
| mmu-miR-2182    | 2.012 |
| mmu-miR-224     | 2.012 |
| mmu-miR-291a-5p | 2.012 |
| mmu-miR-297b-5p | 2.012 |
| mmu-miR-302c    | 2.012 |
| mmu-miR-335-5p  | 2.012 |
| mmu-miR-362-5p  | 2.012 |
| mmu-miR-363     | 2.012 |
| mmu-miR-376c    | 2.012 |
| mmu-miR-429     | 2.012 |
| mmu-miR-449c    | 2.012 |
| mmu-miR-466f-5p | 2.012 |
| mmu-miR-503     | 2.012 |
| mmu-miR-505     | 2.012 |
| mmu-miR-509-5p  | 2.012 |
| mmu-miR-615-3p  | 2.012 |
| mmu-miR-615-5p  | 2.012 |
| mmu-miR-665     | 2.012 |
| mmu-miR-666-3p  | 2.012 |
| mmu-miR-666-5p  | 2.012 |
| mmu-miR-669m    | 2.012 |
| mmu-miR-671-5p  | 2.012 |

|                 |       |
|-----------------|-------|
| mmu-miR-672     | 2.012 |
| mmu-miR-679     | 2.012 |
| mmu-miR-693-5p  | 2.012 |
| mmu-miR-700     | 2.012 |
| mmu-miR-701     | 2.012 |
| mmu-miR-702     | 2.012 |
| mmu-miR-715     | 2.012 |
| mmu-miR-9       | 2.012 |
| mmu-miR-100     | 1.006 |
| mmu-miR-139-3p  | 1.006 |
| mmu-miR-142-5p  | 1.006 |
| mmu-miR-1899    | 1.006 |
| mmu-miR-18b     | 1.006 |
| mmu-miR-1930    | 1.006 |
| mmu-miR-1948    | 1.006 |
| mmu-miR-1954    | 1.006 |
| mmu-miR-196a    | 1.006 |
| mmu-miR-208a    | 1.006 |
| mmu-miR-218     | 1.006 |
| mmu-miR-299     | 1.006 |
| mmu-miR-302b    | 1.006 |
| mmu-miR-370     | 1.006 |
| mmu-miR-450a-3p | 1.006 |
| mmu-miR-491     | 1.006 |
| mmu-miR-501-3p  | 1.006 |
| mmu-miR-504     | 1.006 |
| mmu-miR-509-3p  | 1.006 |
| mmu-miR-590-3p  | 1.006 |
| mmu-miR-673-3p  | 1.006 |
| mmu-miR-675-3p  | 1.006 |
| mmu-miR-680     | 1.006 |
| mmu-miR-681     | 1.006 |
| mmu-miR-682     | 1.006 |
| mmu-miR-687     | 1.006 |
| mmu-miR-691     | 1.006 |
| mmu-miR-714     | 1.006 |
| mmu-miR-763     | 1.006 |

\*miRNAs include all miRNAs reported from Nanostring Technologies including “dead” miRNAs.
