# Supplementary material for: miRNA Signature of Mouse Helper T Cell Hyper-Proliferation
Source: PubMed Central journal article supplement (PMC3692518; doi:10.1371/journal.pone.0066709), 2013-06-25
Supplement: pone.0066709.s013.pdf [file pone.0066709.s013.pdf]

## SUPPLEMENTAL BIBLIOGRAPHY

1. Sonkoly E, Janson P, Majuri ML, Savinko T, Fyhrquist N, et al. (2010) MiR-155 is overexpressed in patients with atopic dermatitis and modulates T-cell proliferative responses by targeting cytotoxic T lymphocyte-associated antigen 4. *J Allergy Clin Immunol* 126: 581-589 e581-520.
2. Neilson JR, Zheng GX, Burge CB, Sharp PA (2007) Dynamic regulation of miRNA expression in ordered stages of cellular development. *Genes Dev* 21: 578-589.
3. Fabbri M, Bottoni A, Shimizu M, Spizzo R, Nicoloso MS, et al. (2011) Association of a microRNA/TP53 feedback circuitry with pathogenesis and outcome of B-cell chronic lymphocytic leukemia. *JAMA* 305: 59-67.
4. Gurha P, Abreu-Goodger C, Wang T, Ramirez MO, Drumond AL, et al. (2012) Targeted deletion of microRNA-22 promotes stress-induced cardiac dilation and contractile dysfunction. *Circulation* 125: 2751-2761.
5. Nagalingam RS, Sundaresan NR, Gupta MP, Geenen D, Solaro RJ, et al. (2013) A cardiac enriched microRNA, miR-378 blocks cardiac hypertrophy by targeting Ras-signaling. *J Biol Chem*.
6. Datta J, Smith A, Lang JC, Islam M, Dutt D, et al. (2012) microRNA-107 functions as a candidate tumor-suppressor gene in head and neck squamous cell carcinoma by downregulation of protein kinase C $\alpha$ . *Oncogene* 31: 4045-4053.
7. Pan W, Zhu S, Yuan M, Cui H, Wang L, et al. (2010) MicroRNA-21 and microRNA-148a contribute to DNA hypomethylation in lupus CD4<sup>+</sup> T cells by directly and indirectly targeting DNA methyltransferase 1. *J Immunol* 184: 6773-6781.
8. Anand S, Majeti BK, Acevedo LM, Murphy EA, Mukthavaram R, et al. (2010) MicroRNA-132-mediated loss of p120RasGAP activates the endothelium to facilitate pathological angiogenesis. *Nat Med* 16: 909-914.
9. Johnson SM, Grosshans H, Shingara J, Byrom M, Jarvis R, et al. (2005) RAS is regulated by the let-7 microRNA family. *Cell* 120: 635-647.
10. Tanic M, Yanowsky K, Rodriguez-Antona C, Andres R, Marquez-Rodas I, et al. (2012) Deregulated miRNAs in hereditary breast cancer revealed a role for miR-30c in regulating KRAS oncogene. *PLoS One* 7: e38847.
11. Yu S, Lu Z, Liu C, Meng Y, Ma Y, et al. (2010) miRNA-96 suppresses KRAS and functions as a tumor suppressor gene in pancreatic cancer. *Cancer Res* 70: 6015-6025.
12. Gennarino VA, Sardiello M, Avellino R, Meola N, Maselli V, et al. (2009) MicroRNA target prediction by expression analysis of host genes. *Genome Res* 19: 481-490.
13. Pagliuca A, Valvo C, Fabrizi E, di Martino S, Biffoni M, et al. (2012) Analysis of the combined action of miR-143 and miR-145 on oncogenic pathways in colorectal cancer cells reveals a coordinate program of gene repression. *Oncogene*.
14. Sayed D, Rane S, Lypowy J, He M, Chen IY, et al. (2008) MicroRNA-21 targets Sprouty2 and promotes cellular outgrowths. *Mol Biol Cell* 19: 3272-3282.
15. Reddy SD, Ohshiro K, Rayala SK, Kumar R (2008) MicroRNA-7, a homeobox D10 target, inhibits p21-activated kinase 1 and regulates its functions. *Cancer Res* 68: 8195-8200.
16. Rouquette-Jazdanian AK, Sommers CL, Kortum RL, Morrison DK, Samelson LE (2012) LAT-independent Erk activation via Bam32-PLC-gamma1-Pak1 complexes: GTPase-independent Pak1 activation. *Mol Cell* 48: 298-312.
17. Zhang H, Hao Y, Yang J, Zhou Y, Li J, et al. (2011) Genome-wide functional screening of miR-23b as a pleiotropic modulator suppressing cancer metastasis. *Nat Commun* 2: 554.
18. Wu L, Cai C, Wang X, Liu M, Li X, et al. (2011) MicroRNA-142-3p, a new regulator of RAC1, suppresses the migration and invasion of hepatocellular carcinoma cells. *FEBS Lett* 585: 1322-1330.
19. Park SY, Lee JH, Ha M, Nam JW, Kim VN (2009) miR-29 miRNAs activate p53 by targeting p85 alpha and CDC42. *Nat Struct Mol Biol* 16: 23-29.
20. Ding J, Huang S, Wu S, Zhao Y, Liang L, et al. (2010) Gain of miR-151 on chromosome 8q24.3 facilitates tumour cell migration and spreading through downregulating RhoGDI. *Nat Cell Biol* 12: 390-399.

21. Tseng CW, Lin CC, Chen CN, Huang HC, Juan HF (2011) Integrative network analysis reveals active microRNAs and their functions in gastric cancer. *BMC Syst Biol* 5: 99.
22. Moriarty CH, Pursell B, Mercurio AM (2010) miR-10b targets Tiam1: implications for Rac activation and carcinoma migration. *J Biol Chem* 285: 20541-20546.
23. Li J, Liang S, Jin H, Xu C, Ma D, et al. (2012) Tiam1, negatively regulated by miR-22, miR-183 and miR-31, is involved in migration, invasion and viability of ovarian cancer cells. *Oncol Rep* 27: 1835-1842.
24. Trompeter HI, Abbad H, Iwaniuk KM, Hafner M, Renwick N, et al. (2011) MicroRNAs MiR-17, MiR-20a, and MiR-106b act in concert to modulate E2F activity on cell cycle arrest during neuronal lineage differentiation of USSC. *PLoS One* 6: e16138.
25. Calin GA, Cimmino A, Fabbri M, Ferracin M, Wojcik SE, et al. (2008) MiR-15a and miR-16-1 cluster functions in human leukemia. *Proc Natl Acad Sci U S A* 105: 5166-5171.
26. Landais S, Landry S, Legault P, Rassart E (2007) Oncogenic potential of the miR-106-363 cluster and its implication in human T-cell leukemia. *Cancer Res* 67: 5699-5707.
27. Hanlon K, Rudin CE, Harries LW (2009) Investigating the targets of MIR-15a and MIR-16-1 in patients with chronic lymphocytic leukemia (CLL). *PLoS One* 4: e7169.
28. Fujita Y, Kojima K, Ohhashi R, Hamada N, Nozawa Y, et al. (2010) MiR-148a attenuates paclitaxel resistance of hormone-refractory, drug-resistant prostate cancer PC3 cells by regulating MSK1 expression. *J Biol Chem* 285: 19076-19084.
29. Curtale G, Citarella F, Carissimi C, Goldoni M, Carucci N, et al. (2010) An emerging player in the adaptive immune response: microRNA-146a is a modulator of IL-2 expression and activation-induced cell death in T lymphocytes. *Blood* 115: 265-273.
30. Rao E, Jiang C, Ji M, Huang X, Iqbal J, et al. (2012) The miRNA-17 approximately 92 cluster mediates chemoresistance and enhances tumor growth in mantle cell lymphoma via PI3K/AKT pathway activation. *Leukemia* 26: 1064-1072.
31. Li QJ, Chau J, Ebert PJ, Sylvester G, Min H, et al. (2007) miR-181a is an intrinsic modulator of T cell sensitivity and selection. *Cell* 129: 147-161.
32. Kikkawa N, Hanazawa T, Fujimura L, Nohata N, Suzuki H, et al. (2010) miR-489 is a tumour-suppressive miRNA target PTPN11 in hypopharyngeal squamous cell carcinoma (HSCC). *Br J Cancer* 103: 877-884.
33. Yamada Y, Enokida H, Kojima S, Kawakami K, Chiyomaru T, et al. (2011) MiR-96 and miR-183 detection in urine serve as potential tumor markers of urothelial carcinoma: correlation with stage and grade, and comparison with urinary cytology. *Cancer Sci* 102: 522-529.
34. Razumilava N, Bronk SF, Smoot RL, Fingas CD, Werneburg NW, et al. (2011) miR-25 targets TNF-related apoptosis inducing ligand (TRAIL) death receptor-4 and promotes apoptosis resistance in cholangiocarcinoma. *Hepatology* 55: 465-475.
35. Wang S, Tang Y, Cui H, Zhao X, Luo X, et al. (2011) Let-7/miR-98 regulate Fas and Fas-mediated apoptosis. *Genes Immun* 12: 149-154.
36. Lin H, Qian J, Castillo AC, Long B, Keyes KT, et al. (2011) Effect of miR-23 on oxidant-induced injury in human retinal pigment epithelial cells. *Invest Ophthalmol Vis Sci* 52: 6308-6314.
37. Liu XS, Chopp M, Wang XL, Zhang L, Hozeska-Solgot A, et al. (2013) MicroRNA-17/92 cluster mediates the proliferation and survival of neural progenitor cells after stroke. *J Biol Chem*.
38. Chhabra R, Adlakha YK, Hariharan M, Scaria V, Saini N (2009) Upregulation of miR-23a-27a-24-2 cluster induces caspase-dependent and -independent apoptosis in human embryonic kidney cells. *PLoS One* 4: e5848.
39. Tili E, Michaille JJ, Cimino A, Costinean S, Dumitru CD, et al. (2007) Modulation of miR-155 and miR-125b levels following lipopolysaccharide/TNF-alpha stimulation and their possible roles in regulating the response to endotoxin shock. *J Immunol* 179: 5082-5089.
40. Tsang WP, Kwok TT (2008) Let-7a microRNA suppresses therapeutics-induced cancer cell death by targeting caspase-3. *Apoptosis* 13: 1215-1222.
41. Ruan W, Xu JM, Li SB, Yuan LQ, Dai RP (2012) Effects of down-regulation of microRNA-23a on TNF-alpha-induced endothelial cell apoptosis through caspase-dependent pathways. *Cardiovasc Res* 93: 623-632.

42. Hudson RS, Yi M, Esposito D, Glynn SA, Starks AM, et al. (2012) MicroRNA-106b-25 cluster expression is associated with early disease recurrence and targets caspase-7 and focal adhesion in human prostate cancer. *Oncogene*.
43. Walker JC, Harland RM (2009) microRNA-24a is required to repress apoptosis in the developing neural retina. *Genes Dev* 23: 1046-1051.
44. Xiong S, Zheng Y, Jiang P, Liu R, Liu X, et al. (2011) MicroRNA-7 inhibits the growth of human non-small cell lung cancer A549 cells through targeting BCL-2. *Int J Biol Sci* 7: 805-814.
45. Cimmino A, Calin GA, Fabbri M, Iorio MV, Ferracin M, et al. (2005) miR-15 and miR-16 induce apoptosis by targeting BCL2. *Proc Natl Acad Sci U S A* 102: 13944-13949.
46. Wickramasinghe NS, Manavalan TT, Dougherty SM, Riggs KA, Li Y, et al. (2009) Estradiol downregulates miR-21 expression and increases miR-21 target gene expression in MCF-7 breast cancer cells. *Nucleic Acids Res* 37: 2584-2595.
47. Druz A, Chu C, Majors B, Sanctuary R, Betenbaugh M, et al. (2011) A novel microRNA mmu-miR-466h affects apoptosis regulation in mammalian cells. *Biotechnol Bioeng* 108: 1651-1661.
48. Shimizu S, Takehara T, Hikita H, Kodama T, Miyagi T, et al. (2010) The let-7 family of microRNAs inhibits Bcl-xL expression and potentiates sorafenib-induced apoptosis in human hepatocellular carcinoma. *J Hepatol* 52: 698-704.
49. Mott JL, Kobayashi S, Bronk SF, Gores GJ (2007) mir-29 regulates Mcl-1 protein expression and apoptosis. *Oncogene* 26: 6133-6140.
50. Wang HJ, Ruan HJ, He XJ, Ma YY, Jiang XT, et al. (2010) MicroRNA-101 is down-regulated in gastric cancer and involved in cell migration and invasion. *Eur J Cancer*.
51. Visone R, Veronese A, Rassenti LZ, Balatti V, Pearl DK, et al. (2011) miR-181b is a biomarker of disease progression in chronic lymphocytic leukemia. *Blood* 118: 3072-3079.
52. Lam LT, Lu X, Zhang H, Lesniewski R, Rosenberg S, et al. (2010) A microRNA screen to identify modulators of sensitivity to BCL2 inhibitor ABT-263 (navitoclax). *Mol Cancer Ther* 9: 2943-2950.
53. Cox MB, Cairns MJ, Gandhi KS, Carroll AP, Moscovis S, et al. (2010) MicroRNAs miR-17 and miR-20a inhibit T cell activation genes and are under-expressed in MS whole blood. *PLoS One* 5: e12132.
54. Zhou M, Liu Z, Zhao Y, Ding Y, Liu H, et al. (2010) MicroRNA-125b confers the resistance of breast cancer cells to paclitaxel through suppression of pro-apoptotic Bcl-2 antagonist killer 1 (Bak1) expression. *J Biol Chem* 285: 21496-21507.
55. Mavrakis KJ, Wolfe AL, Oricchio E, Palomero T, de Keersmaecker K, et al. (2010) Genome-wide RNA-mediated interference screen identifies miR-19 targets in Notch-induced T-cell acute lymphoblastic leukaemia. *Nat Cell Biol* 12: 372-379.
56. Qian L, Van Laake LW, Huang Y, Liu S, Wendland MF, et al. (2011) miR-24 inhibits apoptosis and represses Bim in mouse cardiomyocytes. *J Exp Med* 208: 549-560.
57. Zhang H, Zuo Z, Lu X, Wang L, Wang H, et al. (2012) MiR-25 regulates apoptosis by targeting Bim in human ovarian cancer. *Oncol Rep* 27: 594-598.
58. Gupta S, Read DE, Deepti A, Cawley K, Gupta A, et al. (2012) Perk-dependent repression of miR-106b-25 cluster is required for ER stress-induced apoptosis. *Cell Death Dis* 3: e333.
59. Chen Z, Chen LY, Dai HY, Wang P, Gao S, et al. (2012) miR-301a promotes pancreatic cancer cell proliferation by directly inhibiting Bim expression. *J Cell Biochem* 113: 3229-3235.
60. Shi W, Gerster K, Alajez NM, Tsang J, Waldron L, et al. (2011) MicroRNA-301 mediates proliferation and invasion in human breast cancer. *Cancer Res* 71: 2926-2937.
61. Li J, Donath S, Li Y, Qin D, Prabhakar BS, et al. (2010) miR-30 regulates mitochondrial fission through targeting p53 and the dynamin-related protein-1 pathway. *PLoS Genet* 6: e1000795.
62. Zhang J, Sun Q, Zhang Z, Ge S, Han ZG, et al. (2013) Loss of microRNA-143/145 disturbs cellular growth and apoptosis of human epithelial cancers by impairing the MDM2-p53 feedback loop. *Oncogene* 32: 61-69.

63. Wynendaele J, Bohnke A, Leucci E, Nielsen SJ, Lambertz I, et al. (2010) An illegitimate microRNA target site within the 3' UTR of MDM4 affects ovarian cancer progression and chemosensitivity. *Cancer Res* 70: 9641-9649.
64. Inomata M, Tagawa H, Guo YM, Kameoka Y, Takahashi N, et al. (2009) MicroRNA-17-92 down-regulates expression of distinct targets in different B-cell lymphoma subtypes. *Blood* 113: 396-402.
65. Ivanovska I, Ball AS, Diaz RL, Magnus JF, Kibukawa M, et al. (2008) MicroRNAs in the miR-106b family regulate p21/CDKN1A and promote cell cycle progression. *Mol Cell Biol* 28: 2167-2174.
66. Tang JT, Wang JL, Du W, Hong J, Zhao SL, et al. (2011) MicroRNA 345, a methylation-sensitive microRNA is involved in cell proliferation and invasion in human colorectal cancer. *Carcinogenesis* 32: 1207-1215.
67. Reuland SN, Smith SM, Bemis LT, Goldstein NB, Almeida AR, et al. (2012) MicroRNA-26a Is Strongly Downregulated in Melanoma and Induces Cell Death through Repression of Silencer of Death Domains (SODD). *J Invest Dermatol*.
68. Zheng Y, Yin L, Chen H, Yang S, Pan C, et al. (2012) miR-376a suppresses proliferation and induces apoptosis in hepatocellular carcinoma. *FEBS Lett* 586: 2396-2403.
69. Fang Y, Xue JL, Shen Q, Chen J, Tian L (2012) MicroRNA-7 inhibits tumor growth and metastasis by targeting the phosphoinositide 3-kinase/Akt pathway in hepatocellular carcinoma. *Hepatology* 55: 1852-1862.
70. Zhang J, Guo H, Zhang H, Wang H, Qian G, et al. (2011) Putative tumor suppressor miR-145 inhibits colon cancer cell growth by targeting oncogene Friend leukemia virus integration 1 gene. *Cancer* 117: 86-95.
71. Zhang JG, Wang JJ, Zhao F, Liu Q, Jiang K, et al. (2010) MicroRNA-21 (miR-21) represses tumor suppressor PTEN and promotes growth and invasion in non-small cell lung cancer (NSCLC). *Clin Chim Acta* 411: 846-852.
72. Bar N, Dikstein R (2010) miR-22 forms a regulatory loop in PTEN/AKT pathway and modulates signaling kinetics. *PLoS One* 5: e10859.
73. Huse JT, Brennan C, Hambardzumyan D, Wee B, Pena J, et al. (2009) The PTEN-regulating microRNA miR-26a is amplified in high-grade glioma and facilitates gliomagenesis in vivo. *Genes Dev* 23: 1327-1337.
74. Tumaneng K, Schlegelmilch K, Russell RC, Yimlamai D, Basnet H, et al. (2012) YAP mediates crosstalk between the Hippo and PI(3)K-TOR pathways by suppressing PTEN via miR-29. *Nat Cell Biol* 14: 1322-1329.
75. Fu X, Tian J, Zhang L, Chen Y, Hao Q (2012) Involvement of microRNA-93, a new regulator of PTEN/Akt signaling pathway, in regulation of chemotherapeutic drug cisplatin chemosensitivity in ovarian cancer cells. *FEBS Lett* 586: 1279-1286.
76. Yuan K, Lian Z, Sun B, Clayton MM, Ng IO, et al. (2012) Role of miR-148a in hepatitis B associated hepatocellular carcinoma. *PLoS One* 7: e35331.
77. Cai J, Guan H, Fang L, Yang Y, Zhu X, et al. (2013) MicroRNA-374a activates Wnt/beta-catenin signaling to promote breast cancer metastasis. *J Clin Invest*.
78. Liu S, Patel SH, Ginestier C, Ibarra I, Martin-Trevino R, et al. (2012) MicroRNA93 regulates proliferation and differentiation of normal and malignant breast stem cells. *PLoS Genet* 8: e1002751.
79. Guttilla IK, White BA (2009) Coordinate regulation of FOXO1 by miR-27a, miR-96, and miR-182 in breast cancer cells. *J Biol Chem* 284: 23204-23216.
80. Matsuyama H, Suzuki HI, Nishimori H, Noguchi M, Yao T, et al. (2011) miR-135b mediates NPM-ALK-driven oncogenicity and renders IL-17-producing immunophenotype to anaplastic large cell lymphoma. *Blood* 118: 6881-6892.
81. Hasseine LK, Hinault C, Lebrun P, Gautier N, Paul-Bellon R, et al. (2009) miR-139 impacts FoxO1 action by decreasing FoxO1 protein in mouse hepatocytes. *Biochem Biophys Res Commun* 390: 1278-1282.
82. Lin H, Dai T, Xiong H, Zhao X, Chen X, et al. (2010) Unregulated miR-96 induces cell proliferation in human breast cancer by downregulating transcriptional factor FOXO3a. *PLoS One* 5: e15797.

83. Ucar A, Gupta SK, Fiedler J, Erikci E, Kardasinski M, et al. (2012) The miRNA-212/132 family regulates both cardiac hypertrophy and cardiomyocyte autophagy. *Nat Commun* 3: 1078.
84. Kong W, He L, Coppola M, Guo J, Esposito NN, et al. MicroRNA-155 regulates cell survival, growth, and chemosensitivity by targeting FOXO3a in breast cancer. *J Biol Chem* 285: 17869-17879.
85. Lagos D, Pollara G, Henderson S, Gratrix F, Fabani M, et al. miR-132 regulates antiviral innate immunity through suppression of the p300 transcriptional co-activator. *Nat Cell Biol* 12: 513-519.
86. Xu D, Takeshita F, Hino Y, Fukunaga S, Kudo Y, et al. (2011) miR-22 represses cancer progression by inducing cellular senescence. *J Cell Biol* 193: 409-424.
87. Strum JC, Johnson JH, Ward J, Xie H, Feild J, et al. (2009) MicroRNA 132 regulates nutritional stress-induced chemokine production through repression of SirT1. *Mol Endocrinol* 23: 1876-1884.
88. Rivetti di Val Cervo P, Lena AM, Nicoloso M, Rossi S, Mancini M, et al. (2011) p63-microRNA feedback in keratinocyte senescence. *Proc Natl Acad Sci U S A* 109: 1133-1138.
89. Zhang J, Han C, Wu T (2012) MicroRNA-26a promotes cholangiocarcinoma growth by activating beta-catenin. *Gastroenterology* 143: 246-256 e248.
90. Chen K, Fan W, Wang X, Ke X, Wu G, et al. (2012) MicroRNA-101 mediates the suppressive effect of laminar shear stress on mTOR expression in vascular endothelial cells. *Biochem Biophys Res Commun* 427: 138-142.
91. Zhao G, Zhang JG, Liu Y, Qin Q, Wang B, et al. (2012) miR-148b functions as a tumor suppressor in pancreatic cancer by targeting AMPKalpha1. *Mol Cancer Ther* 12: 83-93.
92. Xu Q, Liu LZ, Qian X, Chen Q, Jiang Y, et al. (2012) MiR-145 directly targets p70S6K1 in cancer cells to inhibit tumor growth and angiogenesis. *Nucleic Acids Res* 40: 761-774.
93. Yamakuchi M, Yagi S, Ito T, Lowenstein CJ (2011) MicroRNA-22 regulates hypoxia signaling in colon cancer cells. *PLoS One* 6: e20291.
94. Dal Monte M, Landi D, Martini D, Bagnoli P (2013) Antiangiogenic role of miR-361 in human umbilical vein endothelial cells: functional interaction with the peptide somatostatin. *Naunyn Schmiedebergs Arch Pharmacol* 386: 15-27.
95. Yamakuchi M, Lotterman CD, Bao C, Hruban RH, Karim B, et al. (2009) P53-induced microRNA-107 inhibits HIF-1 and tumor angiogenesis. *Proc Natl Acad Sci U S A* 107: 6334-6339.
96. Zhu S, Pan W, Song X, Liu Y, Shao X, et al. (2011) The microRNA miR-23b suppresses IL-17-associated autoimmune inflammation by targeting TAB2, TAB3 and IKK-alpha. *Nat Med* 18: 1077-1086.
97. Ye H, Liu X, Lv M, Wu Y, Kuang S, et al. (2012) MicroRNA and transcription factor co-regulatory network analysis reveals miR-19 inhibits CYLD in T-cell acute lymphoblastic leukemia. *Nucleic Acids Res* 40: 5201-5214.
98. Iliopoulos D, Jaeger SA, Hirsch HA, Bulyk ML, Struhl K (2010) STAT3 activation of miR-21 and miR-181b-1 via PTEN and CYLD are part of the epigenetic switch linking inflammation to cancer. *Mol Cell* 39: 493-506.
99. Gantier MP, Stunden HJ, McCoy CE, Behlke MA, Wang D, et al. (2012) A miR-19 regulon that controls NF-kappaB signaling. *Nucleic Acids Res* 40: 8048-8058.
100. Kim SW, Ramasamy K, Bouamar H, Lin AP, Jiang D, et al. (2012) MicroRNAs miR-125a and miR-125b constitutively activate the NF-kappaB pathway by targeting the tumor necrosis factor alpha-induced protein 3 (TNFAIP3, A20). *Proc Natl Acad Sci U S A* 109: 7865-7870.
101. Lu Z, Li Y, Takwi A, Li B, Zhang J, et al. (2011) miR-301a as an NF-kappaB activator in pancreatic cancer cells. *EMBO J* 30: 57-67.
102. Steiner DF, Thomas MF, Hu JK, Yang Z, Babiarz JE, et al. (2011) MicroRNA-29 regulates T-box transcription factors and interferon-gamma production in helper T cells. *Immunity* 35: 169-181.
103. Wang M, Li C, Yu B, Su L, Li J, et al. (2012) Overexpressed miR-301a promotes cell proliferation and invasion by targeting RUNX3 in gastric cancer. *J Gastroenterol*.
104. Rodriguez A, Vigorito E, Clare S, Warren MV, Couttet P, et al. (2007) Requirement of bic/microRNA-155 for normal immune function. *Science* 316: 608-611.

105. Ding S, Liang Y, Zhao M, Liang G, Long H, et al. (2012) Decreased microRNA-142-3p/5p expression causes CD4+ T cell activation and B cell hyperstimulation in systemic lupus erythematosus. *Arthritis Rheum* 64: 2953-2963.
106. Nazarov PV, Reinsbach SE, Muller A, Nicot N, Philippidou D, et al. (2013) Interplay of microRNAs, transcription factors and target genes: linking dynamic expression changes to function. *Nucleic Acids Res* 41: 2817-2831.
107. Ma F, Xu S, Liu X, Zhang Q, Xu X, et al. (2011) The microRNA miR-29 controls innate and adaptive immune responses to intracellular bacterial infection by targeting interferon-gamma. *Nat Immunol* 12: 861-869.
108. He M, Wang QY, Yin QQ, Tang J, Lu Y, et al. (2013) HIF-1alpha downregulates miR-17/20a directly targeting p21 and STAT3: a role in myeloid leukemic cell differentiation. *Cell Death Differ* 20: 408-418.
109. Chen L, Yang Q, Kong WQ, Liu T, Liu M, et al. (2012) MicroRNA-181b targets cAMP responsive element binding protein 1 in gastric adenocarcinomas. *IUBMB Life* 64: 628-635.
110. Liao Y, Lonnerdal B (2010) Global microRNA characterization reveals that miR-103 is involved in IGF-1 stimulated mouse intestinal cell proliferation. *PLoS One* 5: e12976.
111. Zhou J, Wang KC, Wu W, Subramaniam S, Shyy JY, et al. (2011) MicroRNA-21 targets peroxisome proliferators-activated receptor-alpha in an autoregulatory loop to modulate flow-induced endothelial inflammation. *Proc Natl Acad Sci U S A* 108: 10355-10360.
112. Lee EK, Lee MJ, Abdelmohsen K, Kim W, Kim MM, et al. (2010) miR-130 suppresses adipogenesis by inhibiting peroxisome proliferator-activated receptor gamma expression. *Mol Cell Biol* 31: 626-638.
113. Lal A, Navarro F, Maher CA, Maliszewski LE, Yan N, et al. (2009) miR-24 Inhibits cell proliferation by targeting E2F2, MYC, and other cell-cycle genes via binding to "seedless" 3'UTR microRNA recognition elements. *Mol Cell* 35: 610-625.
114. Sachdeva M, Zhu S, Wu F, Wu H, Walia V, et al. (2009) p53 represses c-Myc through induction of the tumor suppressor miR-145. *Proc Natl Acad Sci U S A* 106: 3207-3212.
115. Buechner J, Tomte E, Haug BH, Henriksen JR, Lokke C, et al. (2011) Tumour-suppressor microRNAs let-7 and mir-101 target the proto-oncogene MYCN and inhibit cell proliferation in MYCN-amplified neuroblastoma. *Br J Cancer* 105: 296-303.
116. Fan Q, He M, Deng X, Wu WK, Zhao L, et al. (2012) Derepression of c-Fos caused by MicroRNA-139 down-regulation contributes to the metastasis of human hepatocellular carcinoma. *Cell Biochem Funct*.
117. Loftus JC, Ross JT, Paquette KM, Paulino VM, Nasser S, et al. (2012) miRNA expression profiling in migrating glioblastoma cells: regulation of cell migration and invasion by miR-23b via targeting of Pyk2. *PLoS One* 7: e39818.
118. Liu M, Tang Q, Qiu M, Lang N, Li M, et al. (2011) miR-21 targets the tumor suppressor RhoB and regulates proliferation, invasion and apoptosis in colorectal cancer cells. *FEBS Lett* 585: 2998-3005.
119. Ma L, Teruya-Feldstein J, Weinberg RA (2007) Tumour invasion and metastasis initiated by microRNA-10b in breast cancer. *Nature* 449: 682-688.
120. Zhang J, Ying ZZ, Tang ZL, Long LQ, Li K (2012) MicroRNA-148a promotes myogenic differentiation by targeting the ROCK1 gene. *J Biol Chem* 287: 21093-21101.
